# Supplementary material
Source: PubMed Central journal article supplement (PMC3766731)
Supplement: NIHMS364430-supplement-1_si_001.pdf [file NIHMS364430-supplement-1_si_001.pdf]

## Supporting Information

### Design of $\beta$ -amyloid aggregation inhibitors from a predicted structural motif.

Paul A. Novick\*<sup>†1</sup>, Dahabada H. Lopes<sup>†2</sup>, Kim M. Branson<sup>†1</sup>, Alexandra Esteras-Chopo<sup>3</sup>,  
Isabella A. Graef<sup>3</sup>, Gal Bitan<sup>2,4,5</sup>, and Vijay S. Pande<sup>1</sup>

<sup>1</sup>Department of Chemistry, Stanford University, Stanford, CA 94305

<sup>2</sup>Department of Neurology, UCLA, Los Angeles, CA 90024

<sup>3</sup>Department of Pathology, Stanford University, Stanford, CA 94305

<sup>4</sup>Brain Research Institute, UCLA, Los Angeles, CA 90024

<sup>5</sup>Molecular Biology Institute, UCLA, Los Angeles, CA 90024

<sup>†</sup> Joint First Authors

\* Corresponding author. [pnovick@stanford.edu](mailto:pnovick@stanford.edu); (650) 723 – 3660; 318 W. Campus Dr.  
Stanford, CA 94305

### TOC

| Item                                                                                                        | Page    |
|-------------------------------------------------------------------------------------------------------------|---------|
| Supporting Figure 1 - Turbidity experiment on scrambled peptide                                             | S2      |
| Supporting Figure 2 - Results with [Sem <sup>35</sup> ,D-Pro <sup>37</sup> ]A $\beta$ <sub>42</sub> peptide | S3, S4  |
| Supporting Table 1 - Ranks from Virtual Screening                                                           | S5 - S7 |
| Supporting Figure 3 - LC-MS of <b>1</b> .                                                                   | S8-S12  |
| Supporting Figure 4 - 1HNMR of <b>1</b> , <b>2</b> , and <b>3</b>                                           | S13-S16 |

(A) ASIHKGGAVGGAKVEEDDNFVdPFLISYLEIFGAHVMDVQHR

(B)

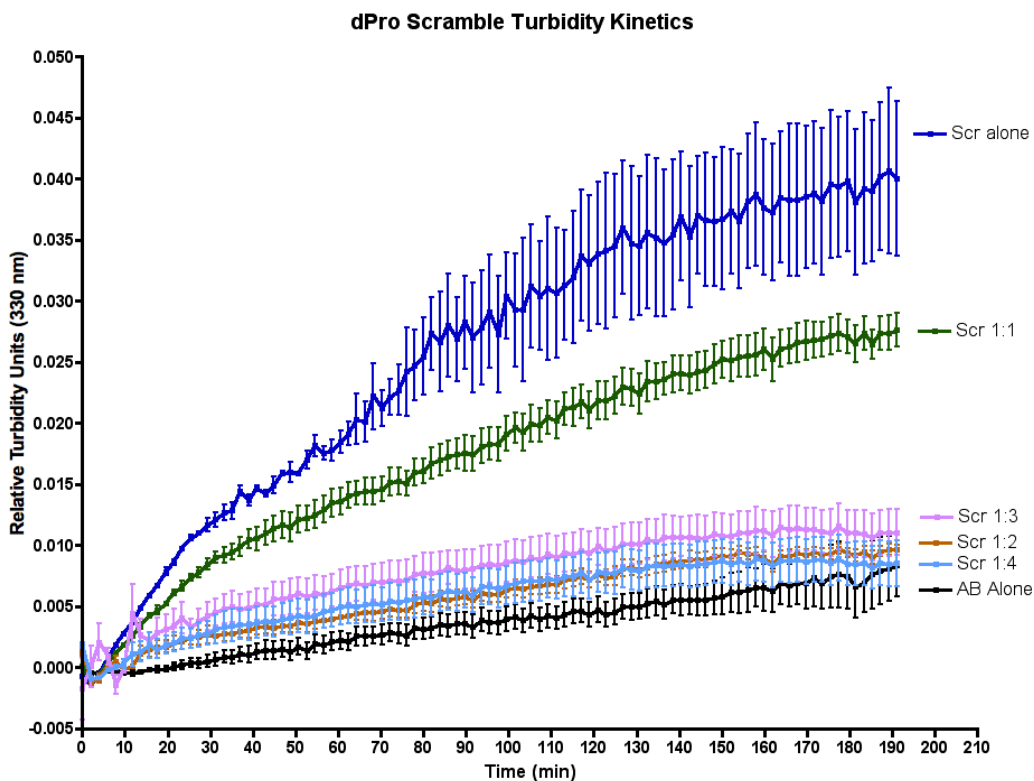

Supporting Figure 1 - A) Sequence of the  $A\beta_{\text{scramble}}$ , produced by rearranging the residues found in  $[D\text{-Pro}^{37}]A\beta_{42}$ . B) The results of a kinetic turbidity assay on  $A\beta_{\text{scramble}}$ , WT  $A\beta_{42}$ , and solutions with various molar ratios of the two peptides. For example, the solution labeled 1:1 contains 25  $\mu\text{M}$  each of  $A\beta_{\text{scramble}}$  and WT  $A\beta_{42}$ , while the 1:4 solution contains 25  $\mu\text{M}$  of WT  $A\beta_{42}$  and only 6.25  $\mu\text{M}$  of  $A\beta_{\text{scramble}}$ . Turbidity was measured by absorbance of light at 330 nm over 3 hours at 37  $^{\circ}\text{C}$ .

(A)

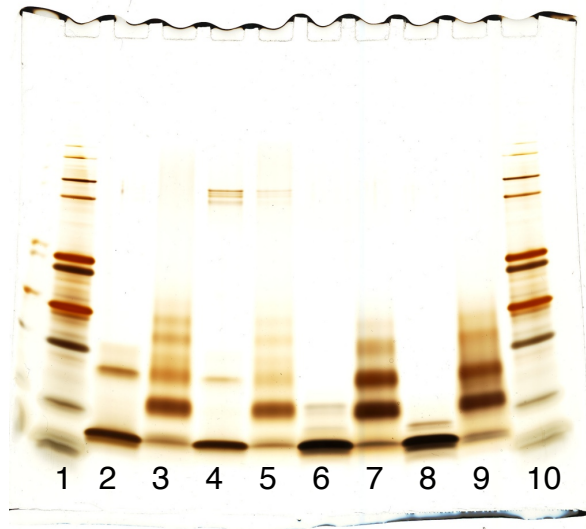

Lane 1 = MW standard

Lane 2 = Uncrosslinked Aβ<sub>42</sub> from Bachem

Lane 3 = Crosslinked Bachem Aβ<sub>42</sub>

Lane 4 = Uncrosslinked Aβ<sub>42</sub> from lab synthesis (homemade)

Lane 5 = Crosslinked homemade Aβ<sub>42</sub>

Lane 6 = Uncrosslinked [Nle<sup>35</sup>,D-Pro<sup>37</sup>]Aβ<sub>42</sub>

Lane 7 = Crosslinked [Nle<sup>35</sup>,D-Pro<sup>37</sup>]Aβ<sub>42</sub>

Lane 8 = Uncrosslinked [Sem<sup>35</sup>,D-Pro<sup>37</sup>]Aβ<sub>42</sub>

Lane 9 = Crosslinked [Sem<sup>35</sup>,D-Pro<sup>37</sup>]Aβ<sub>42</sub>

Lane 10 = MW standard

(B)

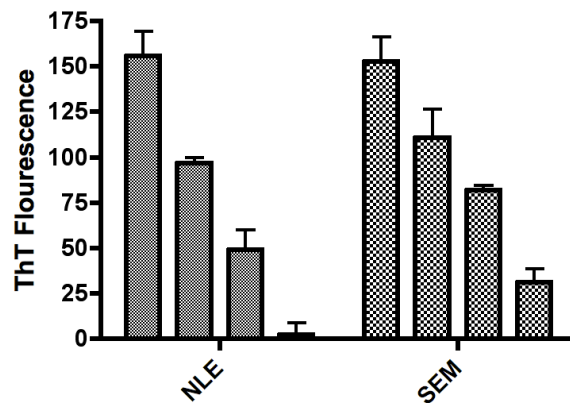

Supporting Figure 2 - Comparison of the properties of [Nle<sup>35</sup>,D-Pro<sup>37</sup>]A $\beta$ <sub>42</sub> and [Sem<sup>35</sup>,D-Pro<sup>37</sup>]A $\beta$ <sub>42</sub>. A) Result from a PICUP/SDS-Page experiment. The cross-linked MW distributions of [Nle<sup>35</sup>,D-Pro<sup>37</sup>]A $\beta$ <sub>42</sub> (lane 7) and [Sem<sup>35</sup>,D-Pro<sup>37</sup>]A $\beta$ <sub>42</sub> (lane 9) are similar, and significantly different than either WT A $\beta$ <sub>42</sub>. B) Results from a ThT experiment measuring fluorescence of the substituted peptides in solution with WT A $\beta$ <sub>42</sub>. For each set of four bars, the left-most bar is the fluorescence of A $\beta$ <sub>42</sub> alone, the next bar is a 1:4 molar ratio of substituted to WT peptide, the third bar is a 1:1 ratio, and the fourth bar is the fluorescence of the substituted peptide alone. The dose dependent decrease in fluorescence upon addition of substituted peptide to WT A $\beta$ <sub>42</sub> is similar for both compounds, with [Nle<sup>35</sup>,D-Pro<sup>37</sup>]A $\beta$ <sub>42</sub> demonstrating slightly increased inhibition in comparison to [Sem<sup>35</sup>,D-Pro<sup>37</sup>]A $\beta$ <sub>42</sub>.

| Structure                                                                                         | Rank | Activity | Structure                                                                                           | Rank | Activity |
|---------------------------------------------------------------------------------------------------|------|----------|-----------------------------------------------------------------------------------------------------|------|----------|
| 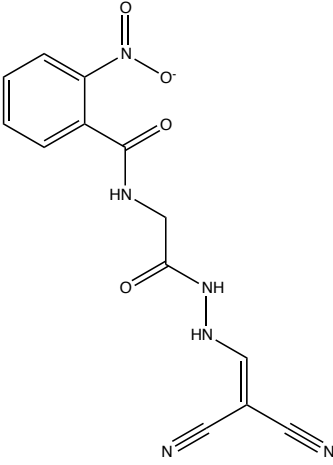 <p>BTB 2612</p> | 2    | 109      |  <p>BTB 5441</p>  | 20   | 156      |
|  <p>BLT 23</p>  | 3    | 83       |  <p>BTB 5443</p> | 30   | 167      |

| Structure                                                                                          | Rank | Activity |                                                                                                     | Rank | Activity |
|----------------------------------------------------------------------------------------------------|------|----------|-----------------------------------------------------------------------------------------------------|------|----------|
| 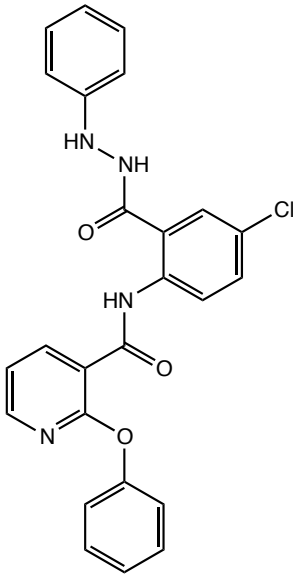 <p>BTB 4932</p>  | 5    | 142      |  <p>BTB 5615</p>  | 31   | 113.8    |
|  <p>BTB 1394</p> | 6    | 149      |  <p>BTB 3068</p> | 32   | 85       |

| Structure                                                                                         | Rank | Activity |                                                                                                    | Rank | Activity |
|---------------------------------------------------------------------------------------------------|------|----------|----------------------------------------------------------------------------------------------------|------|----------|
| 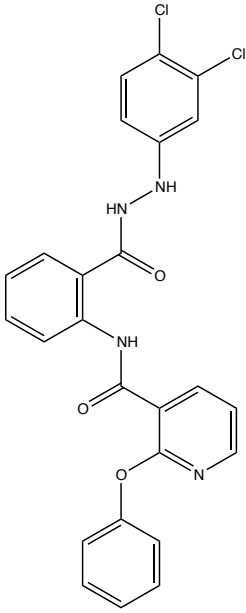 <p>BTB 4940</p> | 8    | 128      |  <p>BTB 5618</p> | 43   | 55       |

Supporting Table 1 - The structures, rank in the virtual screening results, and activity in preliminary single dose ThT experiments (10  $\mu$ M compound) of the 10 highest ranking compounds from the virtual screen that were tested. Only BTB 5618 showed promising activity out of this group of compounds, however this activity was not consistently reproducible in validation assays.

(A)

Z:\data\AI\NovickP\_120208\_34784\_07

2/8/2012 2:45:48 PM

P 20uM PBS fresh

P 20uM PBS fresh

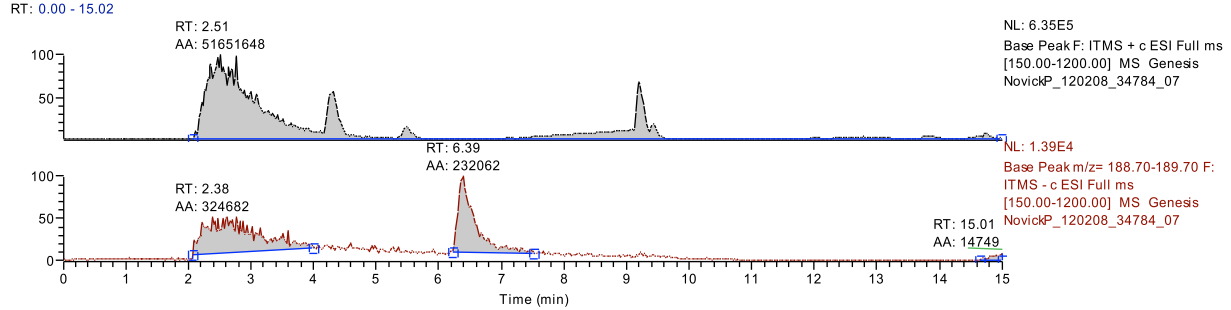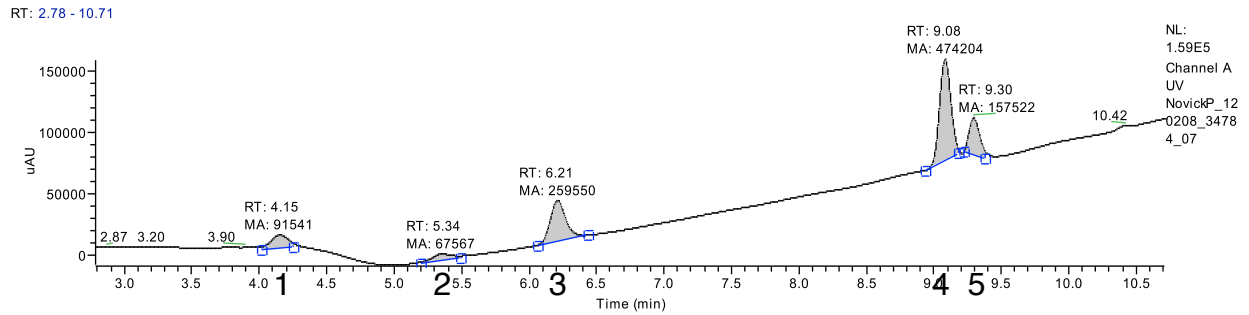

(B)

NovickP\_120208\_34784\_07 #781-817 RT: 4.24-4.38 AV: 7 NL: 3.03E5  
F: ITMS + c ESI Full ms [150.00-1200.00]

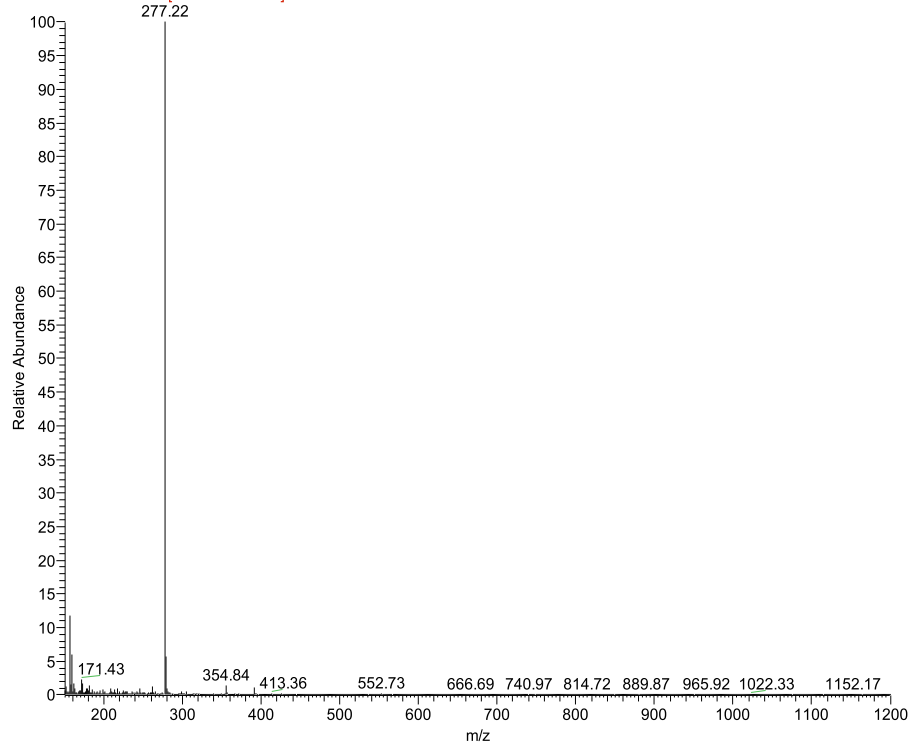



(C)

NovickP\_120208\_34784\_07 #982-1024 RT: 5.33-5.55 AV: 9 NL: 5.57E4  
F: ITMS + c ESI Full ms [150.00-1200.00]

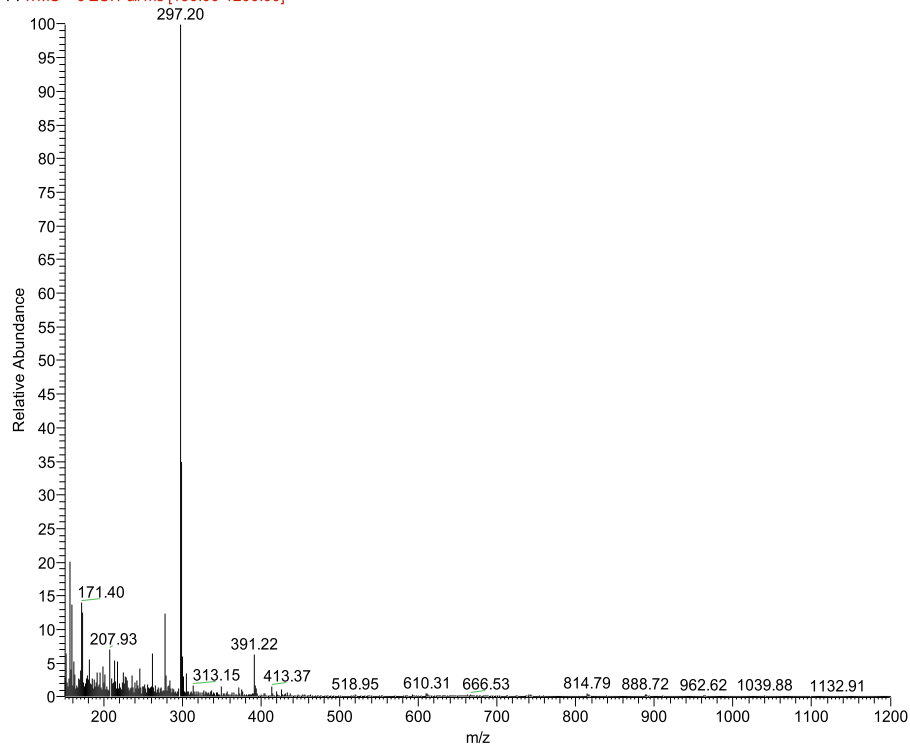

(D)

NovickP\_120208\_34784\_07 #1154-1264 RT: 6.30-6.89 AV: 22 NL: 1.10E4  
F: ITMS - c ESI Full ms [150.00-1200.00]

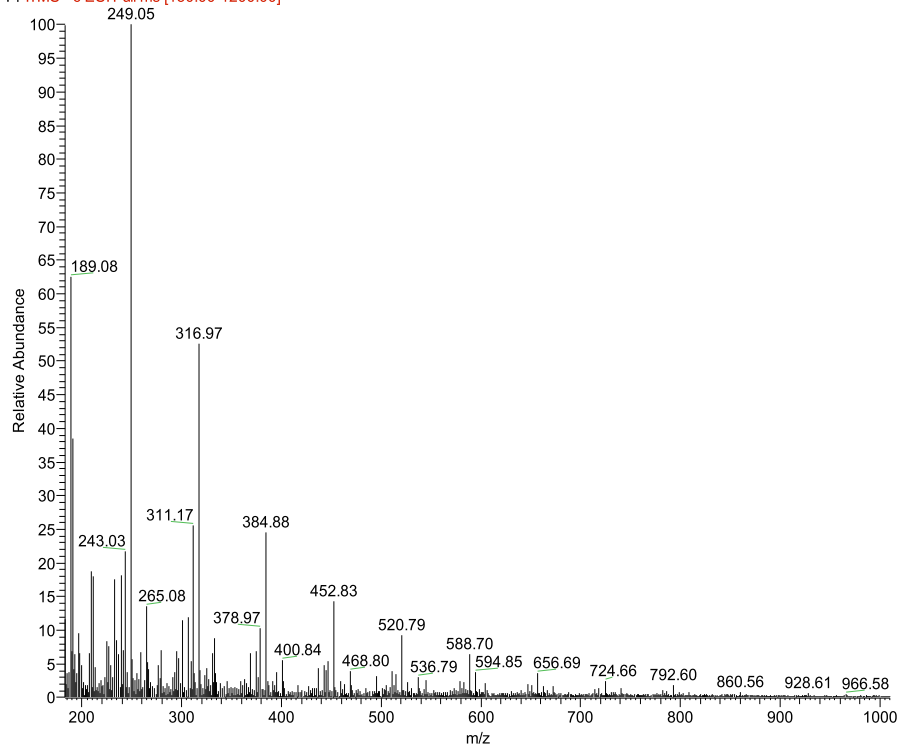

(E)

NovickP\_120208\_34784\_07 #1664-1690 RT: 9.16-9.25 AV: 5 NL: 3.47E5  
F: ITMS + c ESI Full ms [150.00-1200.00]

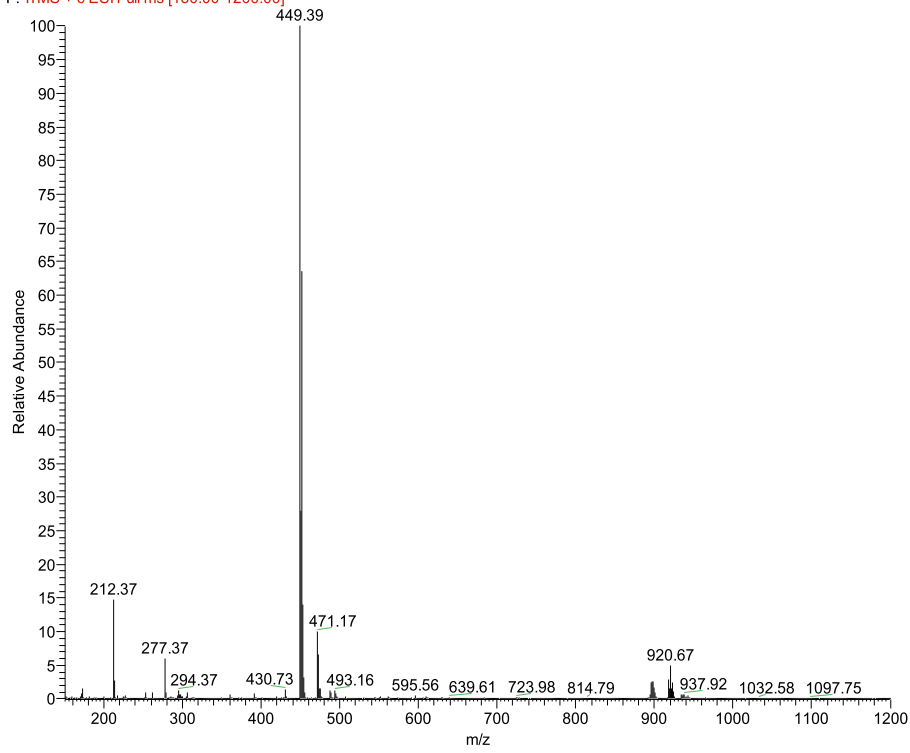

(F)

NovickP\_120208\_34784\_07 #1710-1736 RT: 9.37-9.47 AV: 5 NL: 8.91E4  
F: ITMS + c ESI Full ms [150.00-1200.00]

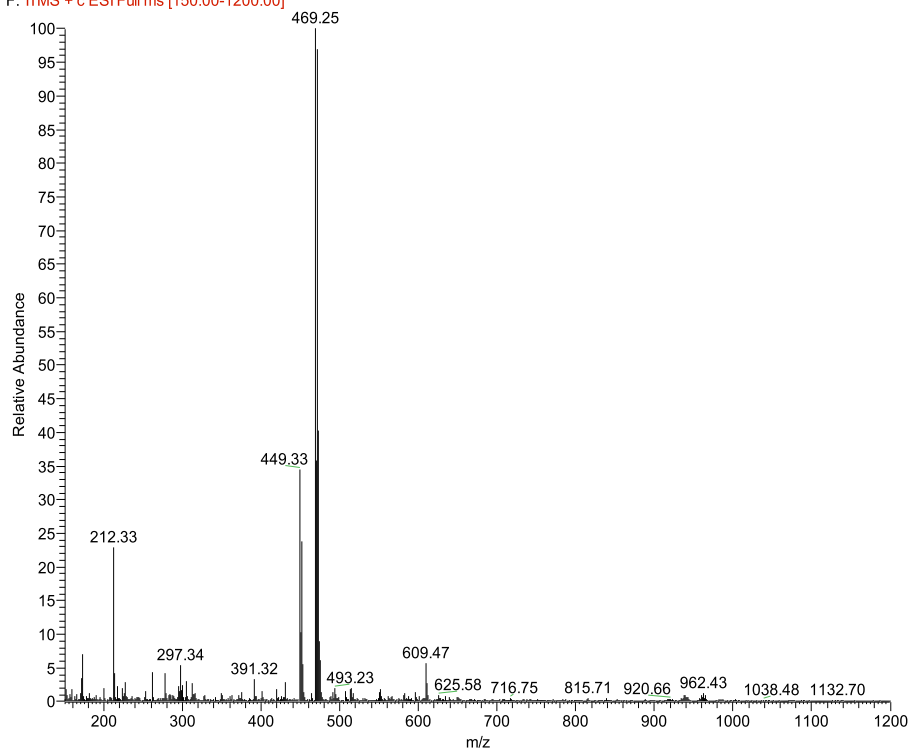

(G)

Z:\data\LA\NovickP\_120208\_34784\_19

2/9/2012 3:35:38 PM

P 20uM PBS 24hr

P 20uM PBS 24hr

RT: 0.00 - 15.01

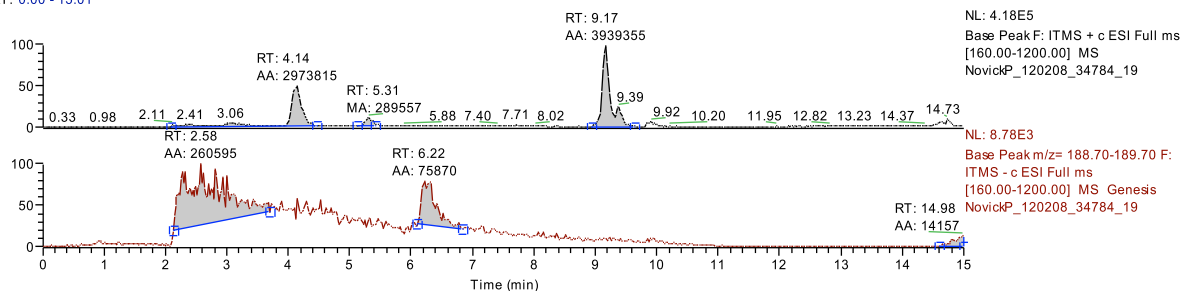

RT: 2.91 - 11.01

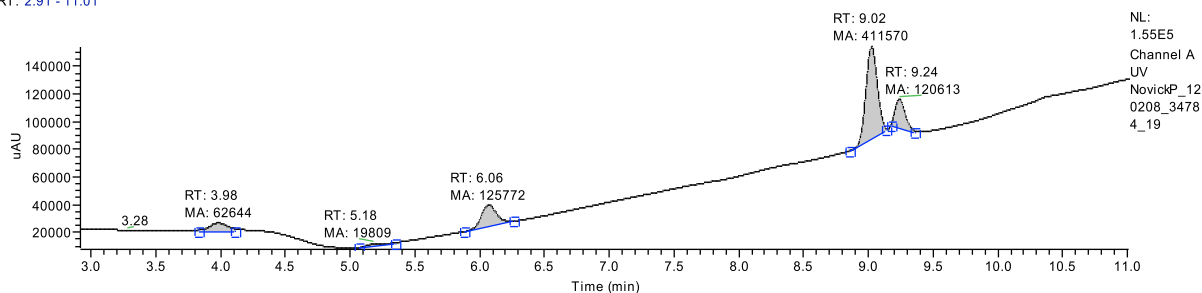

(H)

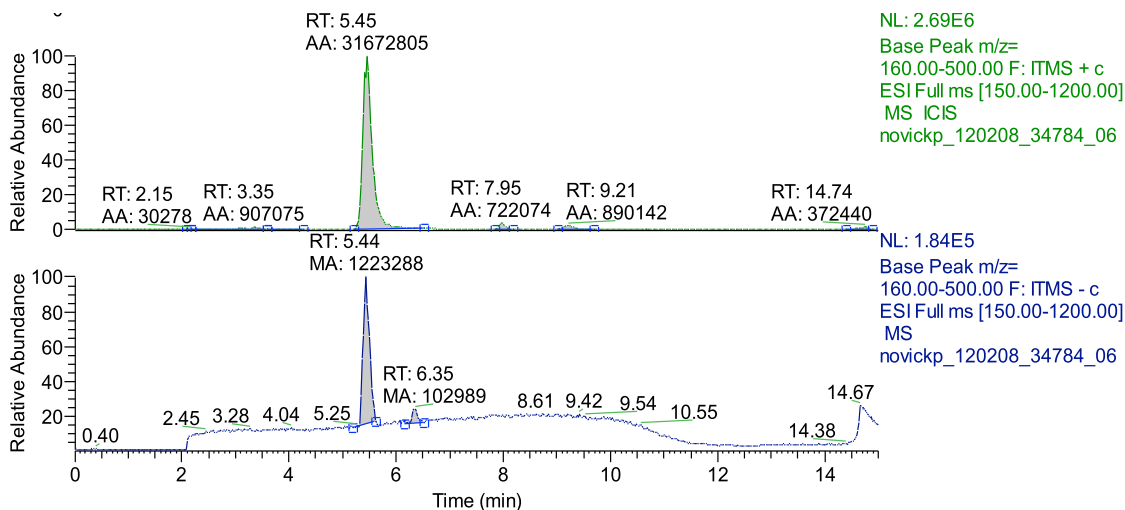

Supporting Figure 3 - LC-MS analysis of **1** and fragments. A) Stock solutions of **1** were diluted into PBS pH=7.4 and immediately analyzed by LC-MS. The signal from mass abundance in ESI positive ionization mode, ESI negative ionization mode, and the UV absorption are shown (top to bottom, respectively). The peaks in the UV absorption are numbered 1-5, and the mass analysis of the peaks is shown in B-F. Peak 1 (**2-20**) corresponds to the mass chromatogram

shown in (B), peak 2 (**2**) corresponds to (C), peak 3 (**3**) corresponds to (D), peak 4 (**1-20**) corresponds to (E), and peak 5 (**1**) corresponds to (F). (G) Analysis of a sample of 1 incubated in PBS for a period of 24hours, with otherwise identical preparation and analysis to (A). The relative peak areas of the 5 components does not vary significantly. (H) Mass abundance in positive (top) and negative (bottom) ionization mode of a freshly made solution containing **2** and **3**. Interestingly, the peak at 4.15 seen in (A) and (G), representing **2-20**, is not found.

(A)

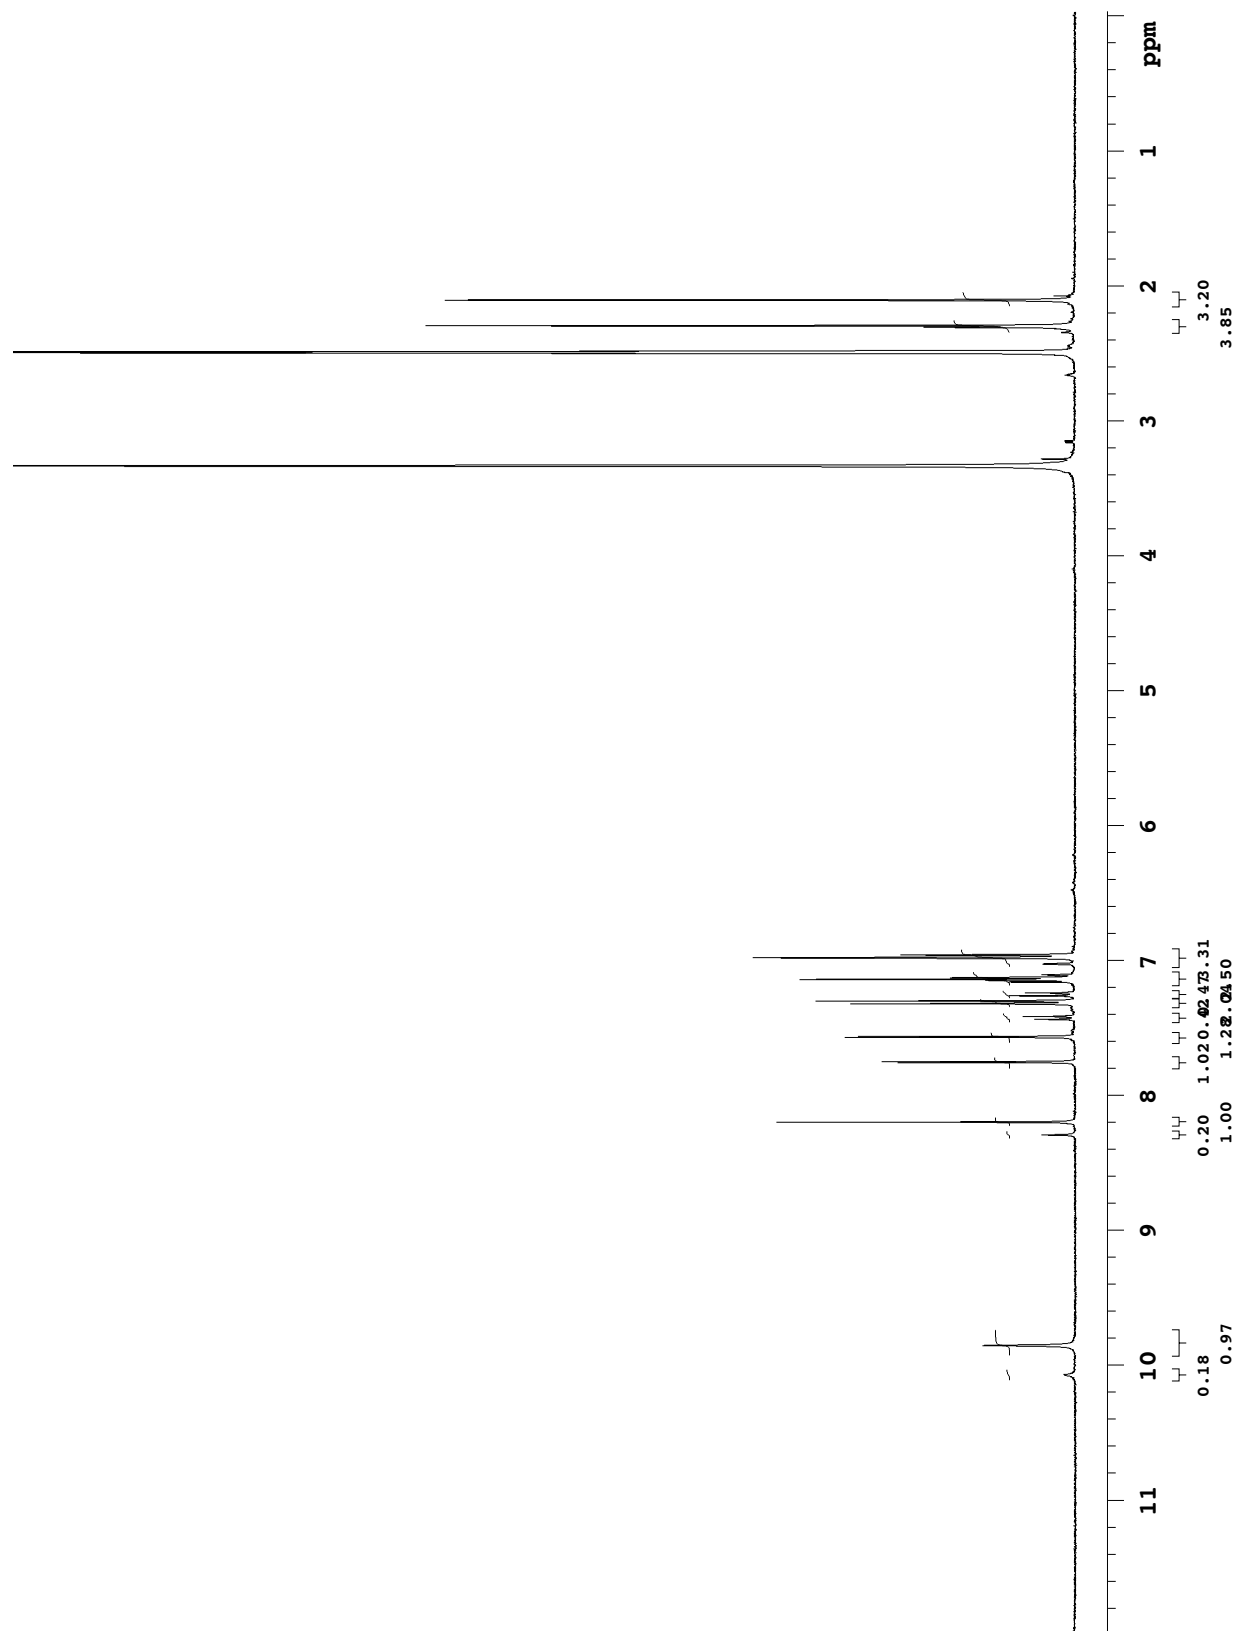

(B)

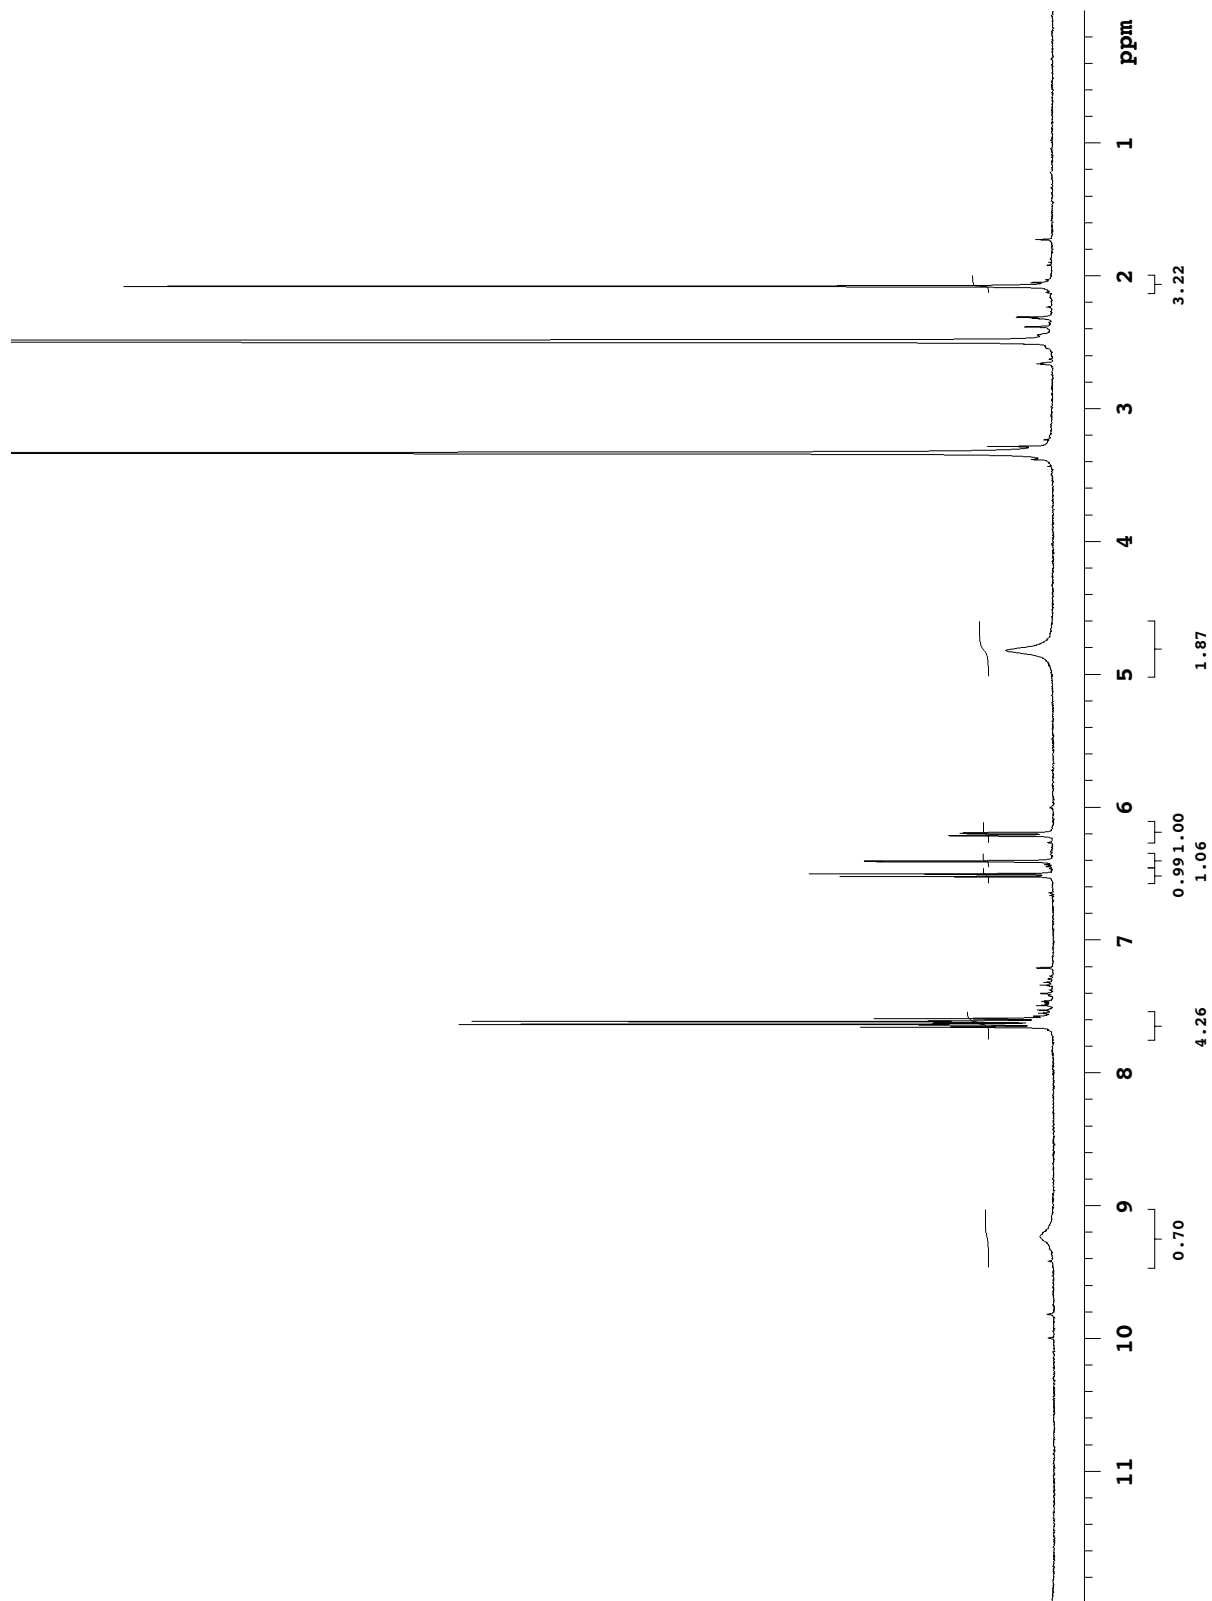

(C)

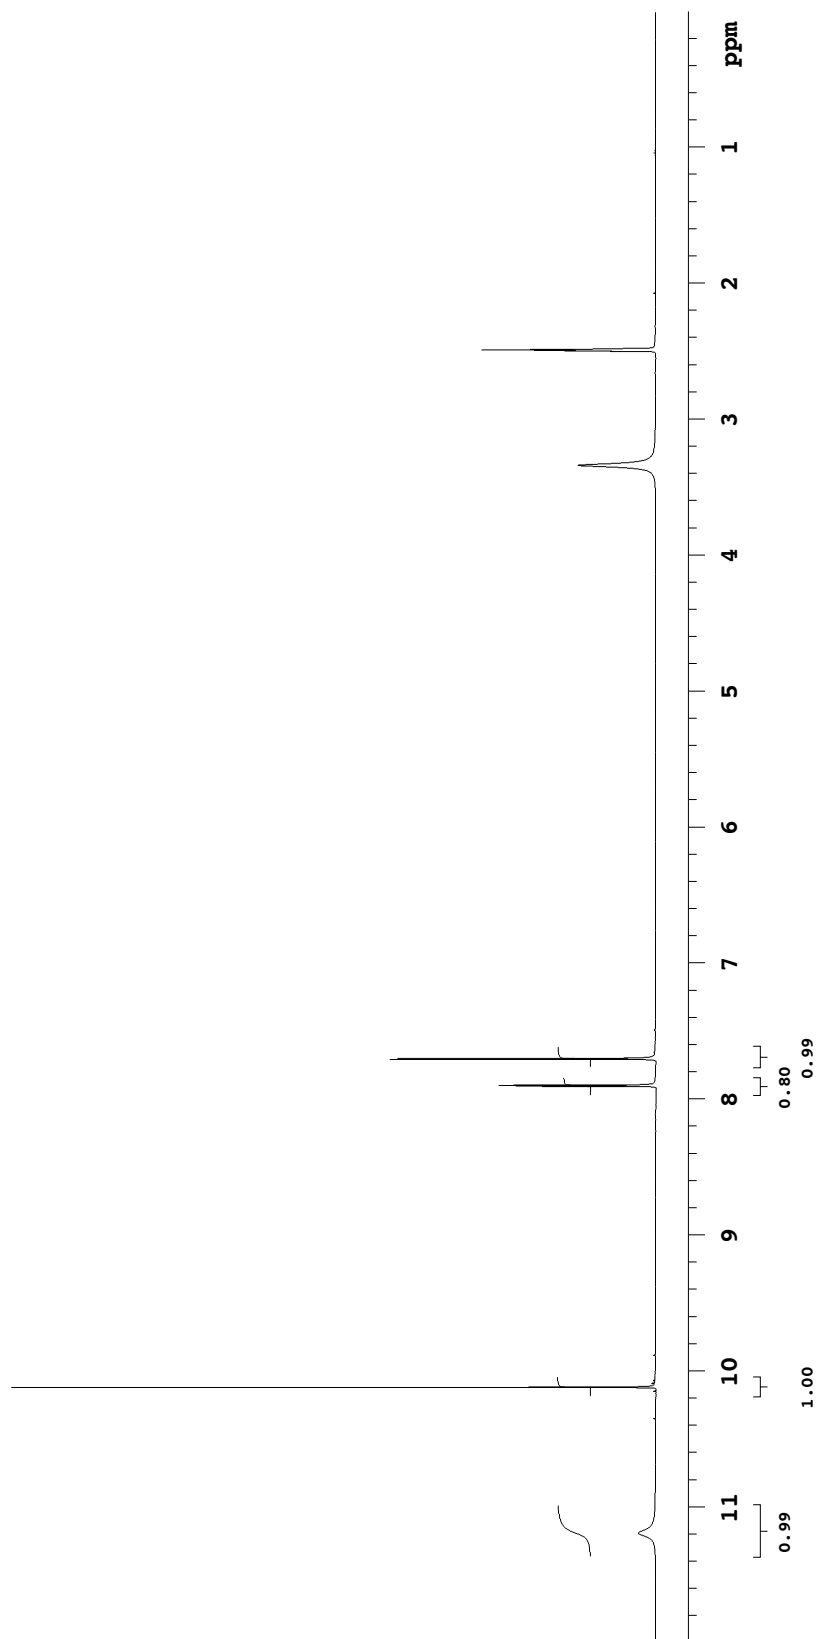

Supporting Figure 4 - <sup>1</sup>H NMR of **1** (A), **2** (B), **3** (C) collected in deuterated DMSO at 400 MHz.
